# Supplementary material
Source: Springer Nature journal article supplement (https://www.springermedizin.de/resource/supplementary/12982_2007_53_MOESM27_ESM.pdf/9604370)
Supplement: MOESM27 [file 9604370]

TAMIL / j kjo;

j i yaqfk;

Mq;fpyk; Ngrhj ehLfS f;fhd mi dtUk; mZ Fk; epi y: nkhojj i l fi s  
Kw;abj j y;

Mr;hah; ISAAC CHUN-HAI FUNG

fUj ;Jr; RUf;fk;

mi dtUk; mZ Fk; epi y , af;fj j ;pd; rklgj j ;pa ntwwpf;F khwhf mwpt ;pay;  
j fty; ghpkhw;wj j ;py; nkhojj i l fs; ngUk; rthyhf t ;sq;Fti j , ej  
j i yaqfk; RI ;bf;fhl ;Lf;wJ. Mq;fpy nkhop gj j ;pupi ffs; nkhojj i l fi s  
Kw;abggj w;fhd ehd;F topKi wfs; , q;F Kd;nkhopag;gl ;Ls;sd,

- 1) Mr;hah;fs; j q;fsJ fi ;Li ufs;pd; fUj ;Jr;RUf;fq;fi s g;w nkhop;fs;py;  
toq;f Ntz ;Lk;
- 2) t ;pf;fp j ;pwe; epi y nkhop ngahgG
- 3) nkhop ngahgghsh;fs; kwWk; j ;pUj j ;pai kggghsh;fS f;fhd rh;t Nj r  
mi kgG.
- 4) g;wnkhop tbtq;fs;py; gj j ;p;pi ffi s ntsp;plj y;

**Emerging themes in Epidemiology** Mr;hah;fs;pd; fUj ;Jr;RUf;fq;fs; kwWk;  
K Oggbt q;fs;pd; nkhopngahgGfi s \$Lj y; NfhgGfshf  
Vw;Wf;nfs;S nkd cl db nray; j ;pl ;l j ;Jl d; mwpt ;pf;fpd;wJ.
